# Supplementary material for: Integration of C1 and C2 Metabolism in Trees
Source: PubMed Central journal article supplement (PMC5666727; doi:10.3390/ijms18102045), 2017-09-23
Supplement: ijms-18-02045-s001.pdf [file ijms-18-02045-s001.pdf]

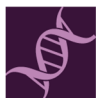

Article

# Integration of C<sub>1</sub> and C<sub>2</sub> Metabolism in Trees

Kolby J. Jardine <sup>1,\*</sup>, Vinicius Fernandes de Souza <sup>2</sup>, Patty Oikawa <sup>3</sup>, Niro Higuchi <sup>2</sup>, Markus Bill <sup>1</sup>, Rachel Porras <sup>1</sup>, Ülo Niinemets <sup>4,5</sup> and Jeffrey Q. Chambers <sup>1,6</sup>

<sup>1</sup> Climate Science Department, Earth Science Division, Lawrence Berkeley National Laboratory, One Cyclotron Rd, building 64-241, Berkeley, CA 94720, USA; mbill@lbl.gov (M.B.); rcporras@lbl.gov (R.P.); jchambers@lbl.gov (J.Q.C.)

<sup>2</sup> National Institute for Amazon Research, Ave. Andre Araujo 2936, Campus II, Building LBA, Manaus AM 69.080-97, Brazil; viniciusfernandes11@yahoo.com.br (V.F.d.S.); higuchi.niro@gmail.com (N.H.)

<sup>3</sup> Department of Earth and Environmental Sciences, California State University, East Bay, North Science 329, 25800 Carlos Bee Boulevard, Hayward, CA 94542, USA; patty.oikawa@csueastbay.edu

<sup>4</sup> Department of Plant Physiology, Estonian University of Life Sciences, Kreutzwaldi 1, 51014 Tartu, Estonia; ylo@emu.ee

<sup>5</sup> Estonian Academy of Sciences, Kohtu 6, 10130 Tallinn, Estonia

<sup>6</sup> Department of Geography, University of California Berkeley, 507 McCone Hall #4740, Berkeley, CA 94720, USA

\* Correspondence: kjjardine@lbl.gov; Tel.: +55-(92)-99200-7280

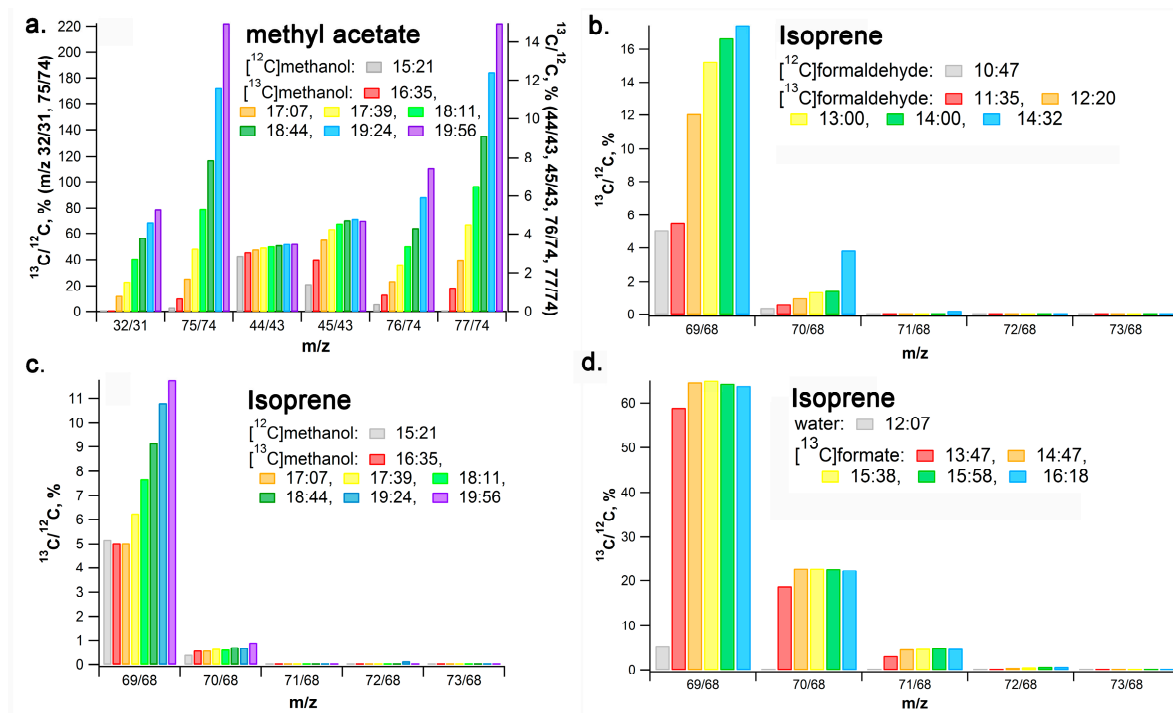

**Figure S1.** Example time series of  $^{13}\text{C}/^{12}\text{C}$  ratios of methyl acetate (a) and isoprene (b-d) emissions determined by thermal desorption GC-MS during continuous  $^{13}\text{C}$ methanol,  $^{13}\text{C}$ formaldehyde, and  $^{13}\text{C}$ formate labeling of an *I. edulis* branch.

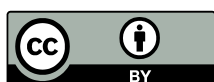

© 2017 by the authors. Submitted for possible open access publication under the terms and conditions of the Creative Commons Attribution (CC BY) license (<http://creativecommons.org/licenses/by/4.0/>).
